# Supplementary material for: Time-dependent covalent network formation in extrudable hydrogels
Source: Royal Society of Chemistry journal article supplement (doi:10.1039/d0py01129k), 2020-01-01
Supplement: d0py01129k1.pdf [file d0py01129k1.pdf]

*Supplementary Information for*  
**Time-Dependent Covalent Network Formation in Extrudable Hydrogels**

Dylan G. Karis<sup>a</sup> and Alshakim Nelson<sup>a</sup>

<sup>a</sup>Department of Chemistry, University of Washington, Seattle, Washington 98105, USA

**Table of Contents**

|                                                                                                                                                                         |    |
|-------------------------------------------------------------------------------------------------------------------------------------------------------------------------|----|
| <b>Figure S1.</b> <sup>1</sup> H NMR spectrum of F127-BUM (500 MHz, 293 K, CDCl <sub>3</sub> ).....                                                                     | 3  |
| <b>Figure S2.</b> GPC trace of F127-BUM in CHCl <sub>3</sub> with 0.1 wt/v% TEA as stabilizer. ....                                                                     | 4  |
| <b>Figure S3.</b> Photorheological experiment on 30 wt% F127-BUM hydrogel with varying equivalents of EDT after 1 day of equilibration. ....                            | 5  |
| <b>Figure S4.</b> Photorheological experiment on 30 wt% F127-BUM hydrogel with varying equivalents of EDT after 3 days of equilibration.....                            | 5  |
| <b>Figure S5.</b> Photorheological experiment on 30 wt% F127-BUM hydrogel with varying equivalents of EDT after 14 days of equilibration. ....                          | 6  |
| <b>Figure S6.</b> Molecular weight between cross-links control with mercaptoethanol.....                                                                                | 6  |
| <b>Figure S7.</b> Viscous flow measurement of 30 wt% F127-BUM at 21 °C with 0.5 equivalents of EDT measured over the course of 14 days.....                             | 7  |
| <b>Figure S8.</b> Viscous flow measurement of 30 wt% F127-BUM at 21 °C with 1 equivalent of EDT measured over the course of 14 days.....                                | 7  |
| <b>Figure S9.</b> Viscous flow measurement of 30 wt% F127-BUM at 21 °C with 1.5 equivalents of EDT measured over the course of 14 days.....                             | 8  |
| <b>Figure S10.</b> Viscous flow measurement of 30 wt% F127-BUM at 21 °C with 2 equivalents of EDT measured over the course of 14 days.....                              | 8  |
| <b>Figure S11.</b> Viscous flow controls. ....                                                                                                                          | 9  |
| <b>Figure S12.</b> Viscous flow measurement of 30 wt% F127-BUM at 21 °C with 1.5 equivalents of EDT without LAP photoinitiator measured over the course of 7 days. .... | 9  |
| <b>Figure S13.</b> Viscous flow measurement of 30 wt% F127-BUM at 21 °C with 3 equivalents of mercaptoethanol measured over the course of 7 days.....                   | 10 |
| <b>Figure S14.</b> Hydrogel tube extrusion setup using coaxial nozzle.....                                                                                              | 10 |
| <b>Figure S15.</b> Frequency sweep measurement of 30 wt% F127-BUM at 1% strain and 21 °C with varying equivalents of EDT immediately after EDT addition.....            | 11 |
| <b>Figure S16.</b> Frequency sweep measurement of 30 wt% F127-BUM at 1% strain and 21 °C with varying equivalents of EDT 1 day after EDT addition. ....                 | 11 |
| <b>Figure S17.</b> Frequency sweep measurement of 30 wt% F127-BUM at 1% strain and 21 °C with varying equivalents of EDT 3 days after EDT addition.....                 | 12 |
| <b>Figure S18.</b> Frequency sweep measurement of 30 wt% F127-BUM at 1% strain and 21 °C with varying equivalents of EDT 7 days after EDT addition.....                 | 12 |
| <b>Figure S19.</b> Frequency sweep measurement of 30 wt% F127-BUM at 1% strain and 21 °C with varying equivalents of EDT 14 days after EDT addition.....                | 13 |

### Supplementary Experimental Details

Gel permeation chromatography was performed using a Waters chromatograph equipped with two 10  $\mu\text{m}$  Malvern columns (300 mm X 7.8 mm) connected in series with increasing pore size (1000, 10000 Å), using chloroform as the eluent, and calibrated with poly(ethylene glycol) standards (102 to 40000 g/mol). Relative molecular weights were measured in chloroform using poly(ethylene glycol) standards and a refractive index detector (flow rate: 1 mL/min).

### Supplementary Table

Table S1. Summary of all data obtained for 30 wt% F127-BUM with varying equivalents of EDT over 14 days of equilibration

| Dithiol equiv. | Day | $G_N^0$ (kg/mol) | $M_c$ (kg/mol) <sup>a</sup> | Y (MPa) <sup>b</sup> | E (MPa) <sup>b</sup> | Max Elongation at break (mm/mm) | Max Comp. Stress (MPa) <sup>c</sup> | Deg. of Swelling (%) | Gel Fraction (%) |
|----------------|-----|------------------|-----------------------------|----------------------|----------------------|---------------------------------|-------------------------------------|----------------------|------------------|
| 0              | 0   | 347 $\pm$ 6      | 7.2 $\pm$ 0.1               | 1.0 $\pm$ 0.1        | 1.1 $\pm$ 0.1        | 0.55 $\pm$ 0.08                 | 5 $\pm$ 1                           | 391 $\pm$ 1          | 97.1 $\pm$ 0.1   |
| 0.5            | 0   | 337.8 $\pm$ 0.6  | 7.43 $\pm$ 0.01             | -                    | -                    | -                               | -                                   | 445.2 $\pm$ 0.6      | 99.0 $\pm$ 0.2   |
|                | 1   | 330 $\pm$ 10     | 7.5 $\pm$ 0.3               | -                    | -                    | -                               | -                                   | 455.5 $\pm$ 0.9      | 98.0 $\pm$ 0.4   |
|                | 3   | 329 $\pm$ 5      | 7.6 $\pm$ 0.1               | 0.78 $\pm$ 0.07      | 0.98 $\pm$ 0.03      | 2.0 $\pm$ 0.2                   | 4.6 $\pm$ 0.9                       | 452 $\pm$ 2          | 96.8 $\pm$ 0.4   |
|                | 7   | 259 $\pm$ 1      | 9.68 $\pm$ 0.05             | -                    | -                    | -                               | -                                   | 482.2 $\pm$ 0.9      | 98.1 $\pm$ 0.3   |
|                | 14  | 266 $\pm$ 3      | 9.4 $\pm$ 0.1               | -                    | -                    | -                               | -                                   | -                    | -                |
| 1              | 0   | 292 $\pm$ 5      | 8.6 $\pm$ 0.3               | -                    | -                    | -                               | -                                   | 467 $\pm$ 4          | 98.5 $\pm$ 0.5   |
|                | 1   | 269 $\pm$ 3      | 9.3 $\pm$ 0.1               | -                    | -                    | -                               | -                                   | 503.4 $\pm$ 8        | 97.6 $\pm$ 0.1   |
|                | 3   | 249 $\pm$ 3      | 10.1 $\pm$ 0.1              | 0.54 $\pm$ 0.04      | 0.654 $\pm$ 0.006    | 3.2 $\pm$ 0.5                   | 2.8 $\pm$ 0.2                       | 533 $\pm$ 3          | 95.9 $\pm$ 0.3   |
|                | 7   | 175 $\pm$ 3      | 14.3 $\pm$ 0.2              | -                    | -                    | -                               | -                                   | 557 $\pm$ 3          | 97.0 $\pm$ 0.4   |
|                | 14  | 230 $\pm$ 10     | 10.8 $\pm$ 0.5              | -                    | -                    | -                               | -                                   | -                    | -                |
| 1.5            | 0   | 266.0 $\pm$ 0.6  | 9.44 $\pm$ 0.02             | -                    | -                    | -                               | -                                   | 502 $\pm$ 1          | 96.7 $\pm$ 0.3   |
|                | 1   | 218 $\pm$ 3      | 11.5 $\pm$ 0.2              | -                    | -                    | -                               | -                                   | 551 $\pm$ 1          | 96.0 $\pm$ 0.2   |
|                | 3   | 172 $\pm$ 4      | 14.6 $\pm$ 0.4              | 0.25 $\pm$ 0.03      | 0.26 $\pm$ 0.03      | 8 $\pm$ 1                       | 1.1 $\pm$ 0.1                       | 682 $\pm$ 8          | 92.4 $\pm$ 0.5   |
|                | 7   | 139 $\pm$ 5      | 18.1 $\pm$ 0.6              | -                    | -                    | -                               | -                                   | 1000 $\pm$ 14        | 90.2 $\pm$ 0.5   |
|                | 14  | 148 $\pm$ 5      | 17.0 $\pm$ 0.6              | -                    | -                    | -                               | -                                   | -                    | -                |
| 2              | 0   | 245 $\pm$ 4      | 10.3 $\pm$ 0.2              | -                    | -                    | -                               | -                                   | 518 $\pm$ 2          | 96.5 $\pm$ 0.1   |
|                | 1   | 191 $\pm$ 4      | 13.2 $\pm$ 0.2              | -                    | -                    | -                               | -                                   | 623 $\pm$ 2          | 94.5 $\pm$ 0.1   |
|                | 3   | 124 $\pm$ 6      | 20 $\pm$ 1                  | 0.04 $\pm$ 0.01      | 0.039 $\pm$ 0.004    | 24.9 $\pm$ 0.9                  | 0.44 $\pm$ 0.06                     | 693 $\pm$ 7          | 83.8 $\pm$ 0.3   |
|                | 7   | 55 $\pm$ 1       | 45 $\pm$ 1                  | -                    | -                    | -                               | -                                   | 2600 $\pm$ 100       | 70. $\pm$ 2      |
|                | 14  | 62 $\pm$ 2       | 41 $\pm$ 1                  | -                    | -                    | -                               | -                                   | -                    | -                |

<sup>a</sup> Calculated using equation (1)

<sup>b</sup> Calculated as the linear region between 0 and 10% extension

<sup>c</sup> Reported at 80% extension

All error given as standard deviation over 3 replicated tests

## Supplementary Figures

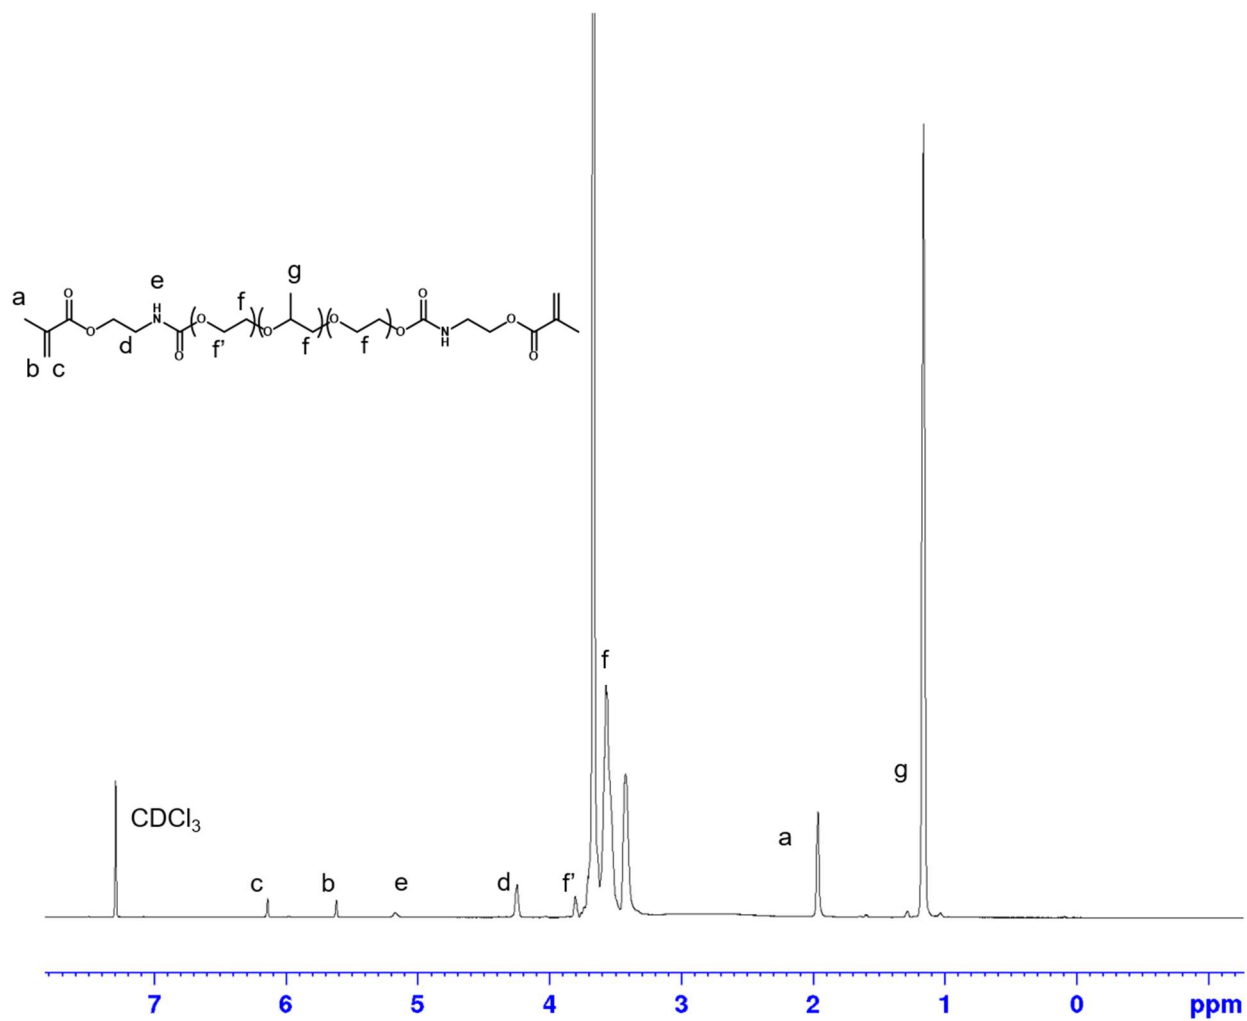

**Figure S1.**  $^1\text{H}$  NMR spectrum of F127-BUM (500 MHz, 293 K,  $\text{CDCl}_3$ )

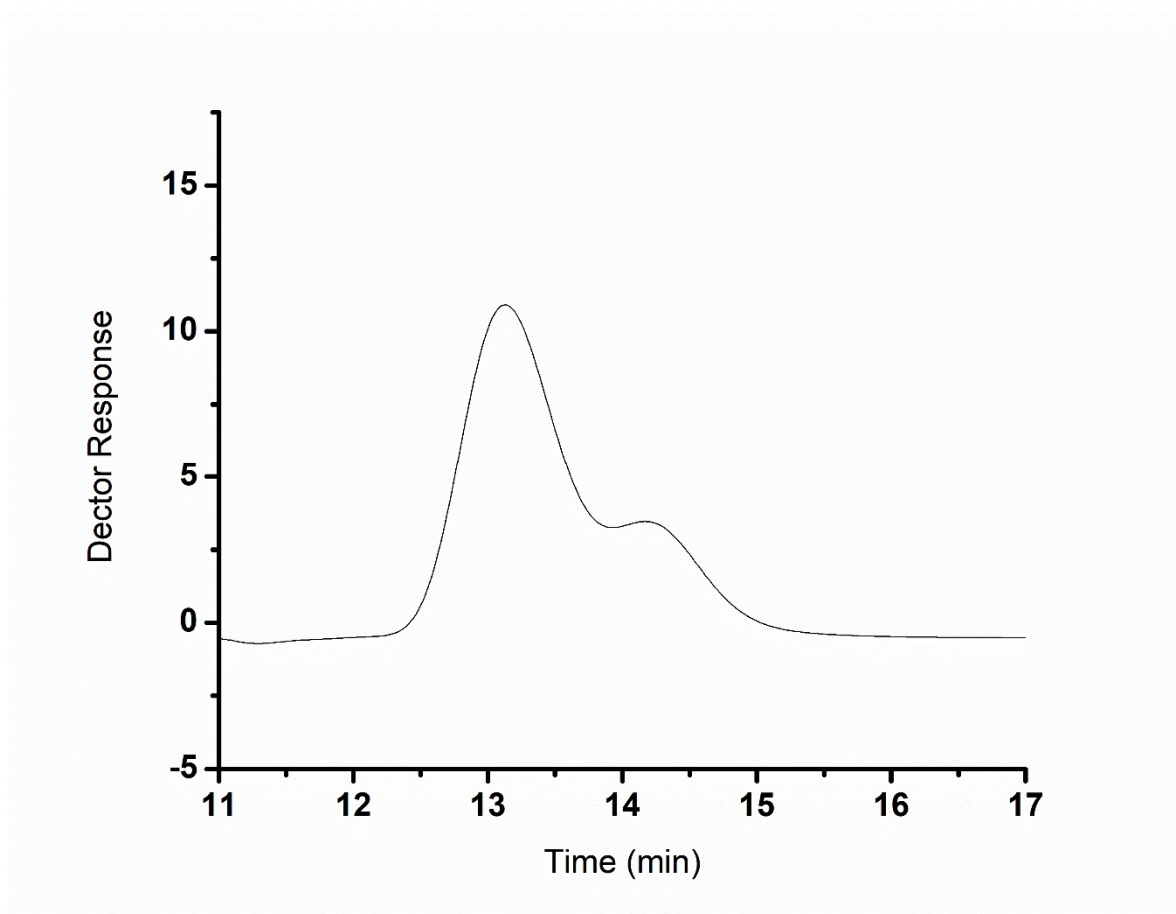

**Figure S2.** GPC trace of F127-BUM in  $\text{CHCl}_3$  with 0.1 wt/v% TEA as stabilizer.

Smaller peak at higher retention time is due to diblock copolymers present in F127 batches from vendor.

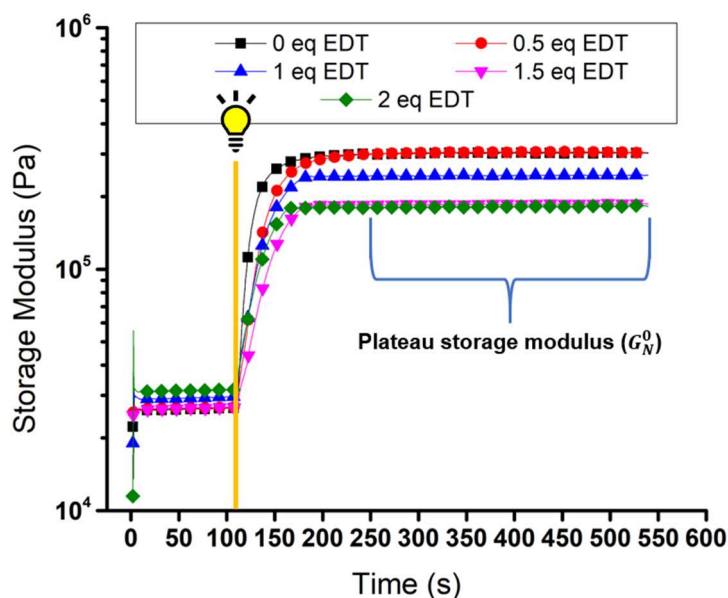

**Figure S3.** Photorheological experiment on 30 wt% F127-BUM hydrogel with varying equivalents of EDT after 1 day of equilibration.

At 120 s, the UV light is turned on and left on for the remainder of the experiment.

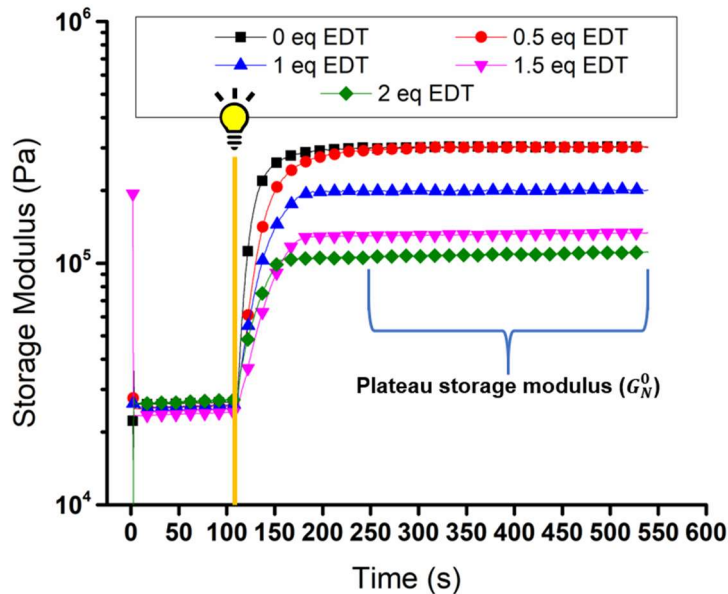

**Figure S4.** Photorheological experiment on 30 wt% F127-BUM hydrogel with varying equivalents of EDT after 3 days of equilibration.

At 120 s, the UV light is turned on and left on for the remainder of the experiment.

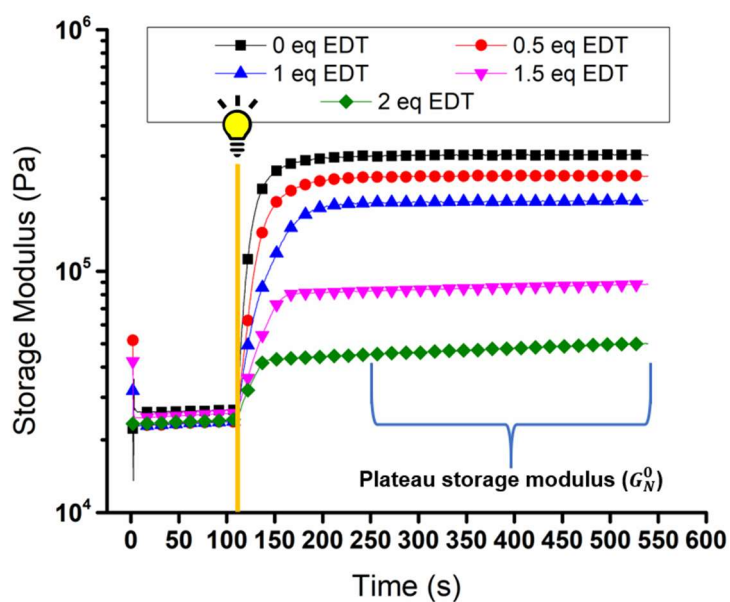

**Figure S5.** Photorheological experiment on 30 wt% F127-BUM hydrogel with varying equivalents of EDT after 14 days of equilibration.

At 120 s, the UV light is turned on and left on for the remainder of the experiment.

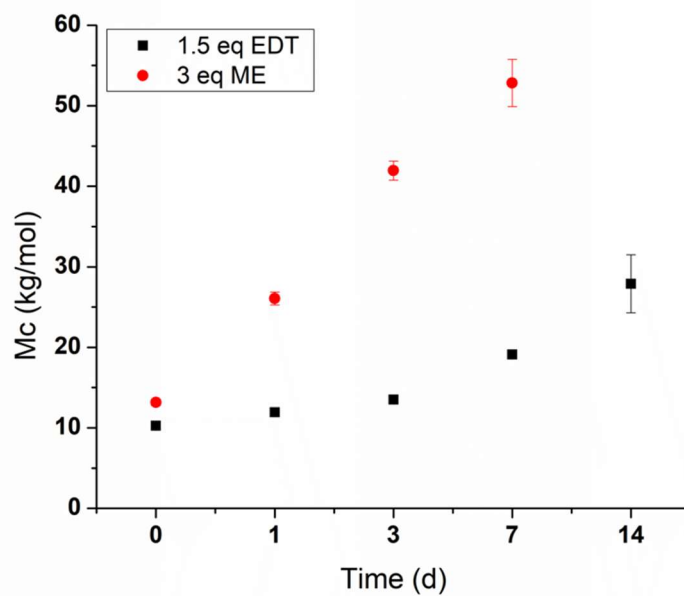

**Figure S6.** Molecular weight between cross-links control with mercaptoethanol.

$M_c$  calculated from equation (1). Mercaptoethanol (ME) shows the effect of dead chain-ends on the  $M_c$  value as ME does not contribute to the hydrogel network.

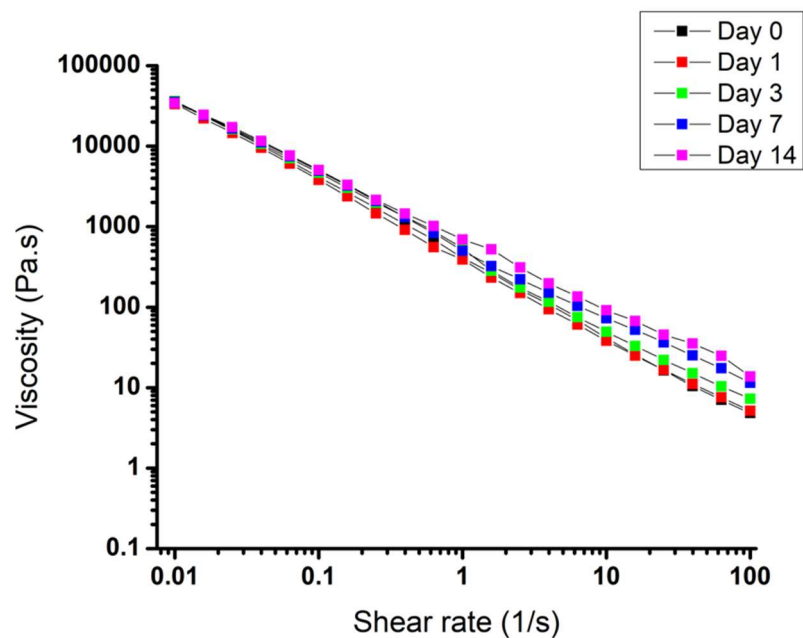

**Figure S7.** Viscous flow measurement of 30 wt% F127-BUM at 21 °C with 0.5 equivalents of EDT measured over the course of 14 days.

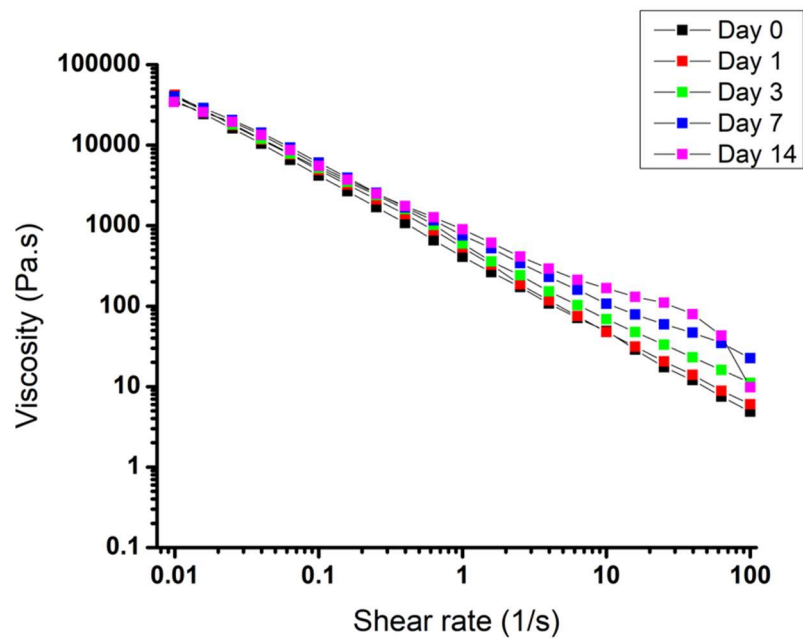

**Figure S8.** Viscous flow measurement of 30 wt% F127-BUM at 21 °C with 1 equivalent of EDT measured over the course of 14 days.

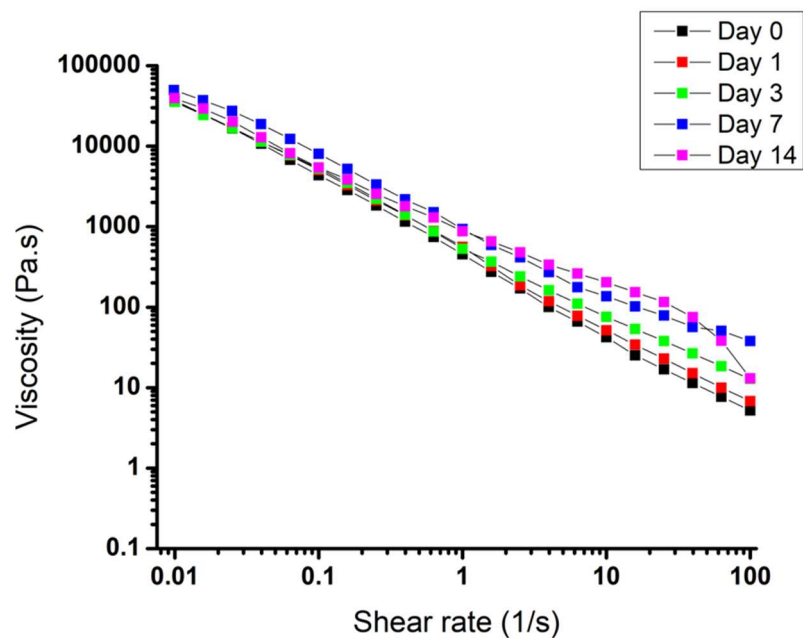

**Figure S9.** Viscous flow measurement of 30 wt% F127-BUM at 21 °C with 1.5 equivalents of EDT measured over the course of 14 days.

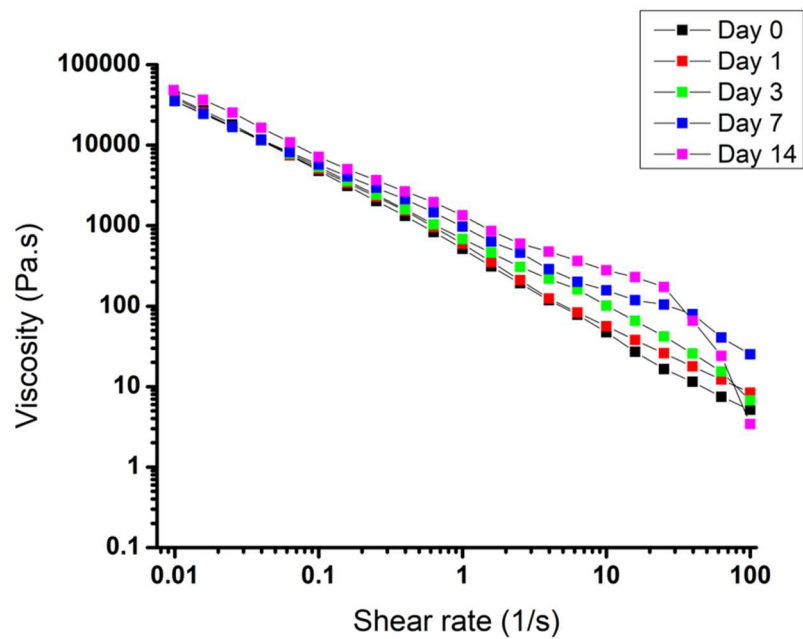

**Figure S10.** Viscous flow measurement of 30 wt% F127-BUM at 21 °C with 2 equivalents of EDT measured over the course of 14 days.



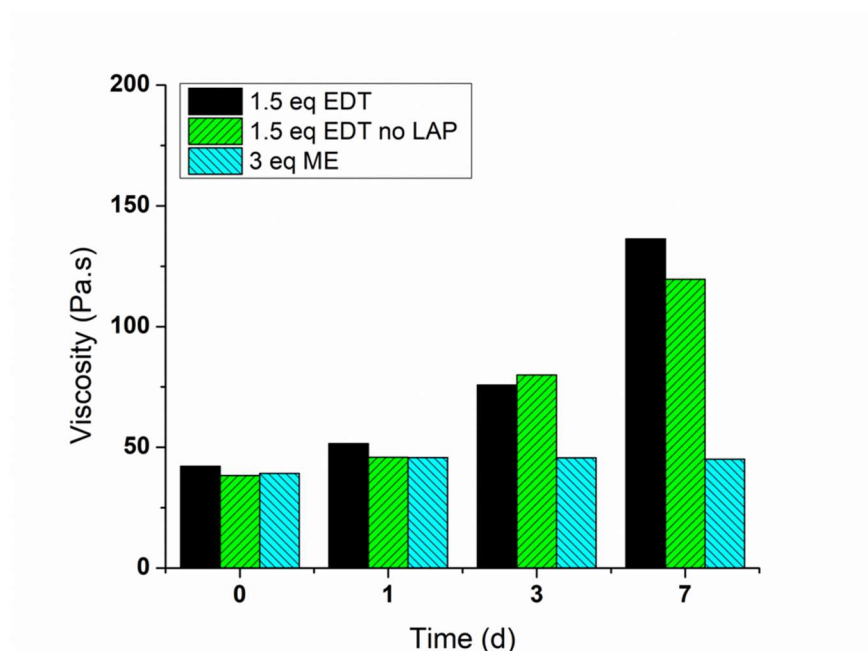

**Figure S11.** Viscous flow controls.

Measurements of 30 wt% F127-BUM taken at  $10 \text{ s}^{-1}$  and at  $21^\circ\text{C}$ . The photoinitiator LAP does not influence the viscosity change over time. Mercaptoethanol has no effect on the viscosity of the hydrogel.

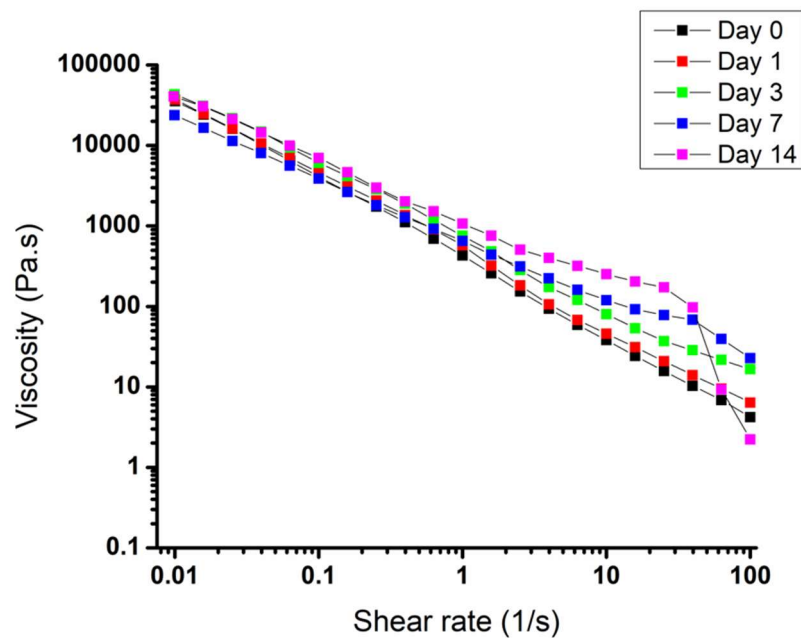

**Figure S12.** Viscous flow measurement of 30 wt% F127-BUM at  $21^\circ\text{C}$  with 1.5 equivalents of EDT without LAP photoinitiator measured over the course of 7 days.

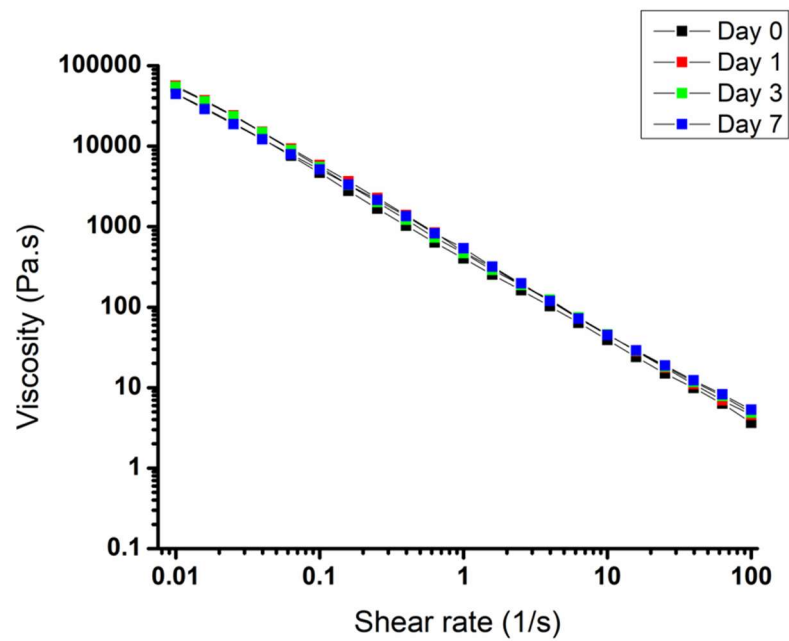

**Figure S13.** Viscous flow measurement of 30 wt% F127-BUM at 21 °C with 3 equivalents of mercaptoethanol measured over the course of 7 days.

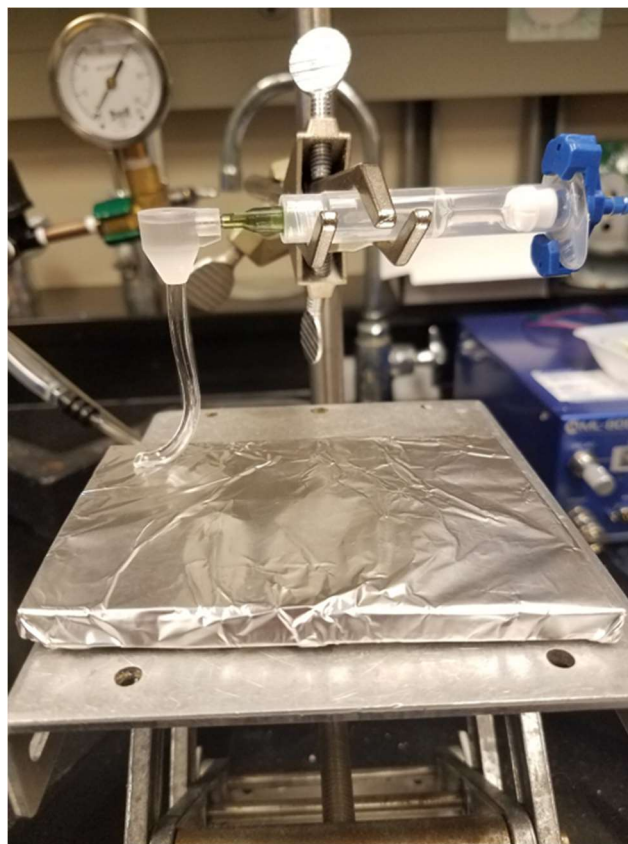

**Figure S14.** Hydrogel tube extrusion setup using coaxial nozzle

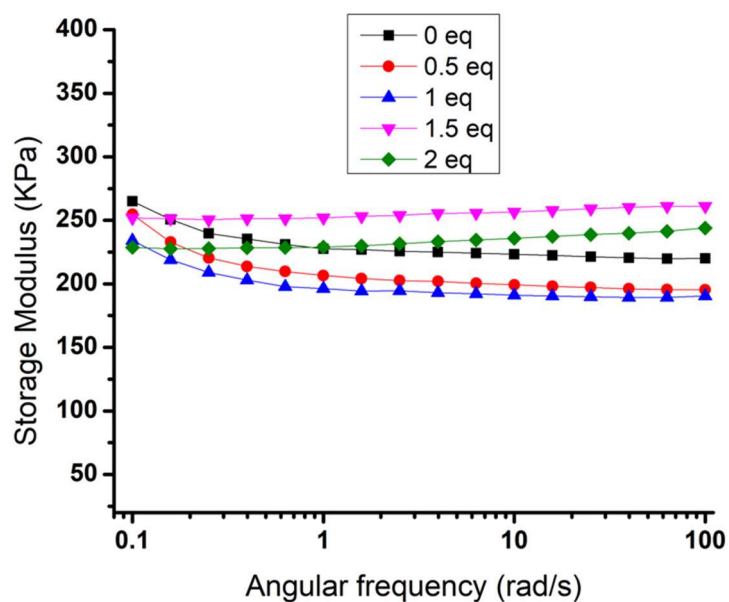

**Figure S15.** Frequency sweep measurement of 30 wt% F127-BUM at 1% strain and 21 °C with varying equivalents of EDT immediately after EDT addition.

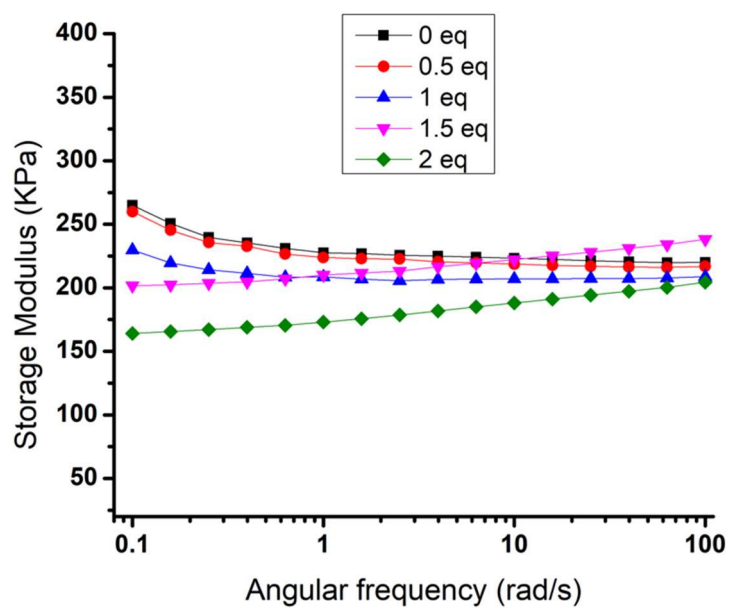

**Figure S16.** Frequency sweep measurement of 30 wt% F127-BUM at 1% strain and 21 °C with varying equivalents of EDT 1 day after EDT addition.

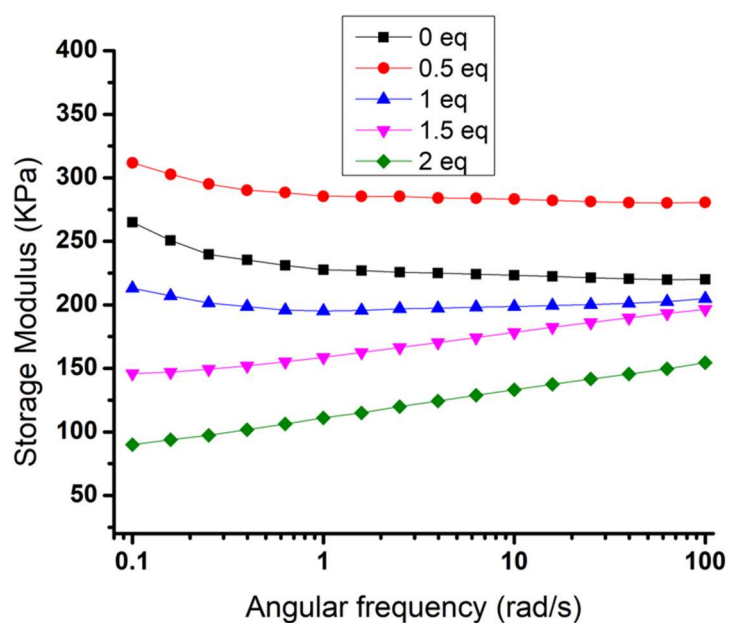

**Figure S17.** Frequency sweep measurement of 30 wt% F127-BUM at 1% strain and 21 °C with varying equivalents of EDT 3 days after EDT addition.

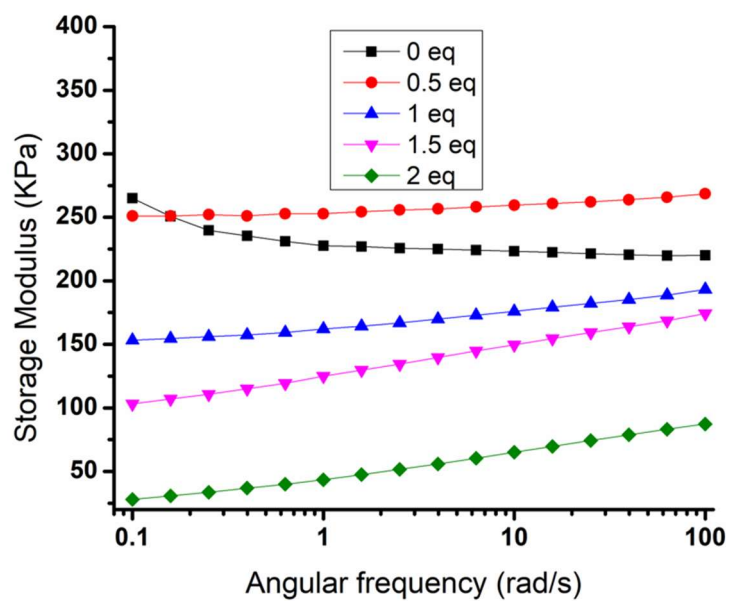

**Figure S18.** Frequency sweep measurement of 30 wt% F127-BUM at 1% strain and 21 °C with varying equivalents of EDT 7 days after EDT addition.

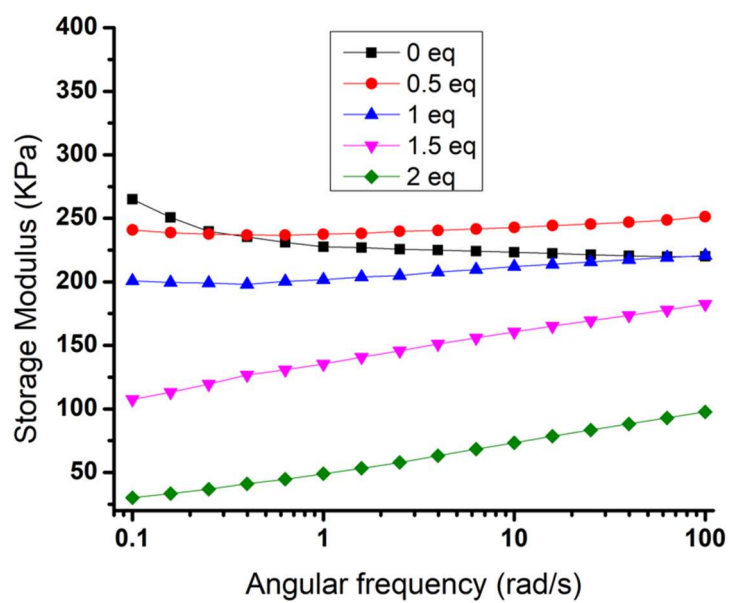

**Figure S19.** Frequency sweep measurement of 30 wt% F127-BUM at 1% strain and 21 °C with varying equivalents of EDT 14 days after EDT addition.
